# Supplementary material for: Real-Life Effectiveness of Adalimumab Biosimilars in Patients with Chronic Plaque Psoriasis
Source: Springer Nature journal article supplement (doi:10.1007/s13555-022-00732-y), 2022-04-27

## **SUPPLEMENTARY MATERIAL**

### **Real-life effectiveness of adalimumab biosimilars in patients with chronic plaque psoriasis**

Francesco Bellinato<sup>1</sup>, Paolo Gisondi<sup>1</sup>, Elena Mason<sup>1</sup>, Paolo Ricci<sup>1</sup>, Martina Maurelli<sup>1</sup>, Giampiero Girolomoni<sup>1</sup>

<sup>1</sup> Section of Dermatology and Venereology, Department of Medicine, University of Verona, Verona, Italy

\*Corresponding author:

Dr. Francesco Bellinato

Section of Dermatology and Venereology, Department of Medicine, University of Verona

Piazzale A. Stefani 1, 37126 Verona, Italy

E-mail: francesco.bellinato@univr.it

**Supplementary Table 1. Descriptive characteristics of the study population in patients treated with adalimumab biosimilar as first systemic treatment vs after conventional treatments**

|                                         | <b>Adalimumab biosimilar as first systemic treatment</b> | <b>Adalimumab biosimilar after conventional treatments<sup>^</sup></b> | <b>p*</b> |
|-----------------------------------------|----------------------------------------------------------|------------------------------------------------------------------------|-----------|
|                                         | <b>(n=150)</b>                                           | <b>(n=260)</b>                                                         |           |
| <b>Age, mean ± SD years</b>             | 51.13 ± 14.20                                            | 52.12 ± 14.75                                                          | 0.511     |
| <b>Gender, male, n (%)</b>              | 102 (68)                                                 | 169 (65)                                                               | 0.537     |
| <b>BMI, mean ± SD kg/m<sup>2</sup></b>  | 26.72 ± 4.06                                             | 26.87 ± 4.15                                                           | 0.718     |
| <b>PASI, mean ± SD</b>                  | 14.00 ± 3.98                                             | 14.87 ± 5.53                                                           | 0.092     |
| <b>Psoriasis duration, years</b>        | 12.79 ± 10.37                                            | 18.45 ± 11.27                                                          | <0.001    |
| <b>Body areas affected by psoriasis</b> |                                                          |                                                                        |           |
| <b>Palmoplantar, n (%)</b>              | 17(11)                                                   | 40(15)                                                                 | 0.253     |
| <b>Nails, n (%)</b>                     | 29(19)                                                   | 45(17)                                                                 | 0.607     |
| <b>Folds, n (%)</b>                     | 21(14)                                                   | 34 (13)                                                                | 0.792     |
| <b>Comorbidities</b>                    |                                                          |                                                                        |           |
| <b>Diabetes, n (%)</b>                  | 14 (9)                                                   | 18 (7)                                                                 | 0.381     |
| <b>Arterial hypertension, n (%)</b>     | 37 (25)                                                  | 61 (23)                                                                | 0.783     |
| <b>PsA, n (%)</b>                       | 24 (16)                                                  | 43 (17)                                                                | 0.887     |

Continuous and categorical variables are presented as mean ± standard deviation (SD) and proportion, respectively. \*Unpaired t-test for quantitative variables; chi-squared test for qualitative variables; SD, standard deviation; BMI, body mass index; PASI, psoriasis area and severity index; PsA, psoriatic arthritis. <sup>^</sup> including methotrexate, cyclosporine, acitretin and fumarates.

**Supplementary Table 2. Descriptive characteristics of the study population in treatment with adalimumab biosimilars at the beginning of follow-up after propensity score matching**

|                                         | <b>Adalimumab biosimilar as first systemic treatment</b> | <b>Adalimumab biosimilar after conventional treatments<sup>^</sup></b> |           |
|-----------------------------------------|----------------------------------------------------------|------------------------------------------------------------------------|-----------|
|                                         | <b>(n=118)</b>                                           | <b>(n=118)</b>                                                         | <b>p*</b> |
| <b>Age, mean ± SD years</b>             | 51.67 ± 13.23                                            | 51.42 ± 14.87                                                          | 0.890     |
| <b>Sex, male, n (%)</b>                 | 78 (66)                                                  | 78 (66)                                                                | 1.000     |
| <b>BMI, mean ± SD kg/m<sup>2</sup></b>  | 26.82 ± 4.03                                             | 26.76 ± 4.33                                                           | 0.912     |
| <b>Body areas affected by psoriasis</b> |                                                          |                                                                        |           |
| <b>Palmoplantar, n (%)</b>              | 14 (12)                                                  | 13 (11)                                                                | 0.838     |
| <b>Nails, n (%)</b>                     | 24 (20)                                                  | 15 (13)                                                                | 0.115     |
| <b>Folds, n (%)</b>                     | 17 (14)                                                  | 10 (8)                                                                 | 0.152     |
| <b>Comorbidities</b>                    |                                                          |                                                                        |           |
| <b>Diabetes, n (%)</b>                  | 11 (9)                                                   | 11 (9)                                                                 | 1.000     |
| <b>Hypertension, n (%)</b>              | 31 (26)                                                  | 20 (17)                                                                | 0.082     |
| <b>Psoriatic arthritis, n (%)</b>       | 20 (17)                                                  | 11 (9)                                                                 | 0.083     |

Continuous and categorical variables are presented as mean ± standard deviation (SD) and proportion, respectively. \*Unpaired t-test for quantitative variables; chi-squared test for qualitative variables; SD, standard deviation; BMI, body mass index; PASI, psoriasis area and severity index; <sup>^</sup> including methotrexate, cyclosporine, acitretin and fumarates.

**Supplementary Table 3. Multivariate Cox regression model assessing the risk of drug failure after propensity score matching**

| Variable                                      | Univariate analysis |       | Multivariate analysis |       | * |
|-----------------------------------------------|---------------------|-------|-----------------------|-------|---|
|                                               | HR (95% CI)         | p     | aHR (95% CI)          | p     |   |
| <b>Gender, male</b>                           | 1.30 (0.69-2.43)    | 0.414 | 1.42 (0.76-2.67)      | 0.270 |   |
| <b>Age (years)</b>                            | 1.00 (0.98-1.02)    | 0.742 | 1.00 (0.98-1.02)      | 0.783 |   |
| <b>BMI ≥ 30</b>                               | 1.77 (0.99-3.15)    | 0.053 | 1.74 (0.97-3.14)      | 0.065 |   |
| <b>PsA</b>                                    | 0.21 (0.05-0.87)    | 0.031 | 0.19 (0.04-0.78)      | 0.022 |   |
| <b>Adalimumab as first systemic treatment</b> | 0.53 (0.31-0.94)    | 0.029 | 0.55 (0.31-0.96)      | 0.037 |   |

N=236; BMI, body mass index; PsA, psoriatic arthritis.

**Supplementary figure 1.** Distribution of previous conventional systemic treatments and switching patterns in patients with chronic plaque psoriasis included in the study.

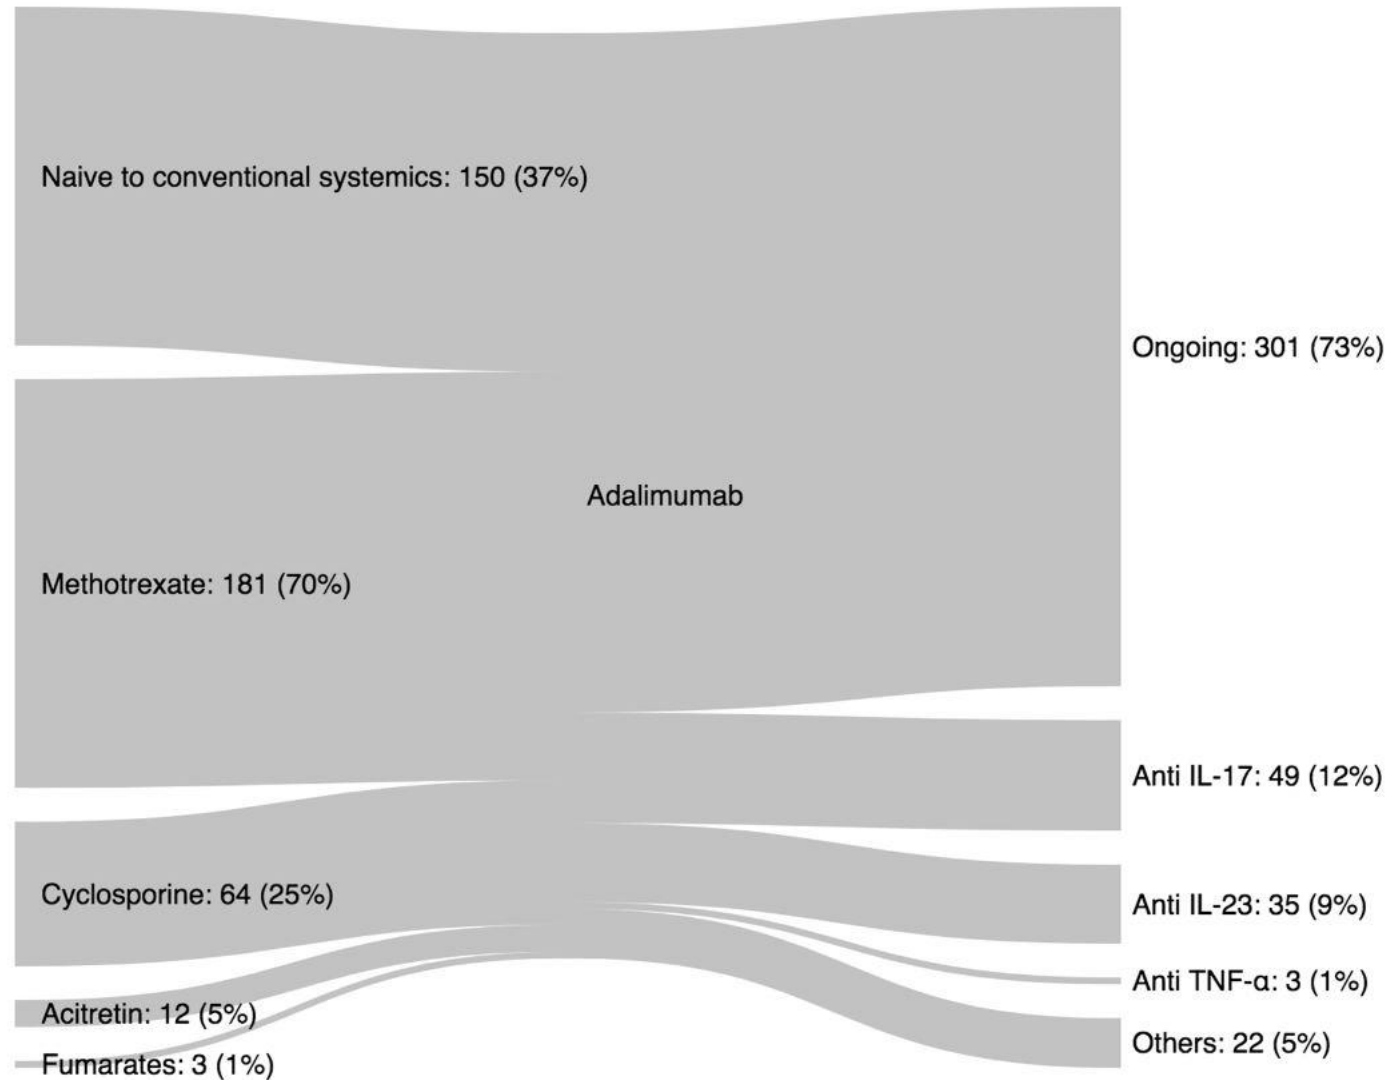

**Supplementary figure 2.** Drug survival in patients with chronic plaque psoriasis treated with adalimumab biosimilars as first systemic treatment (dashed line), versus after failure of conventional systemic drugs (continue line) after propensity score matching adjustment based on disease duration. Log-rank test for equality of survivor functions  $p < 0.001$ .

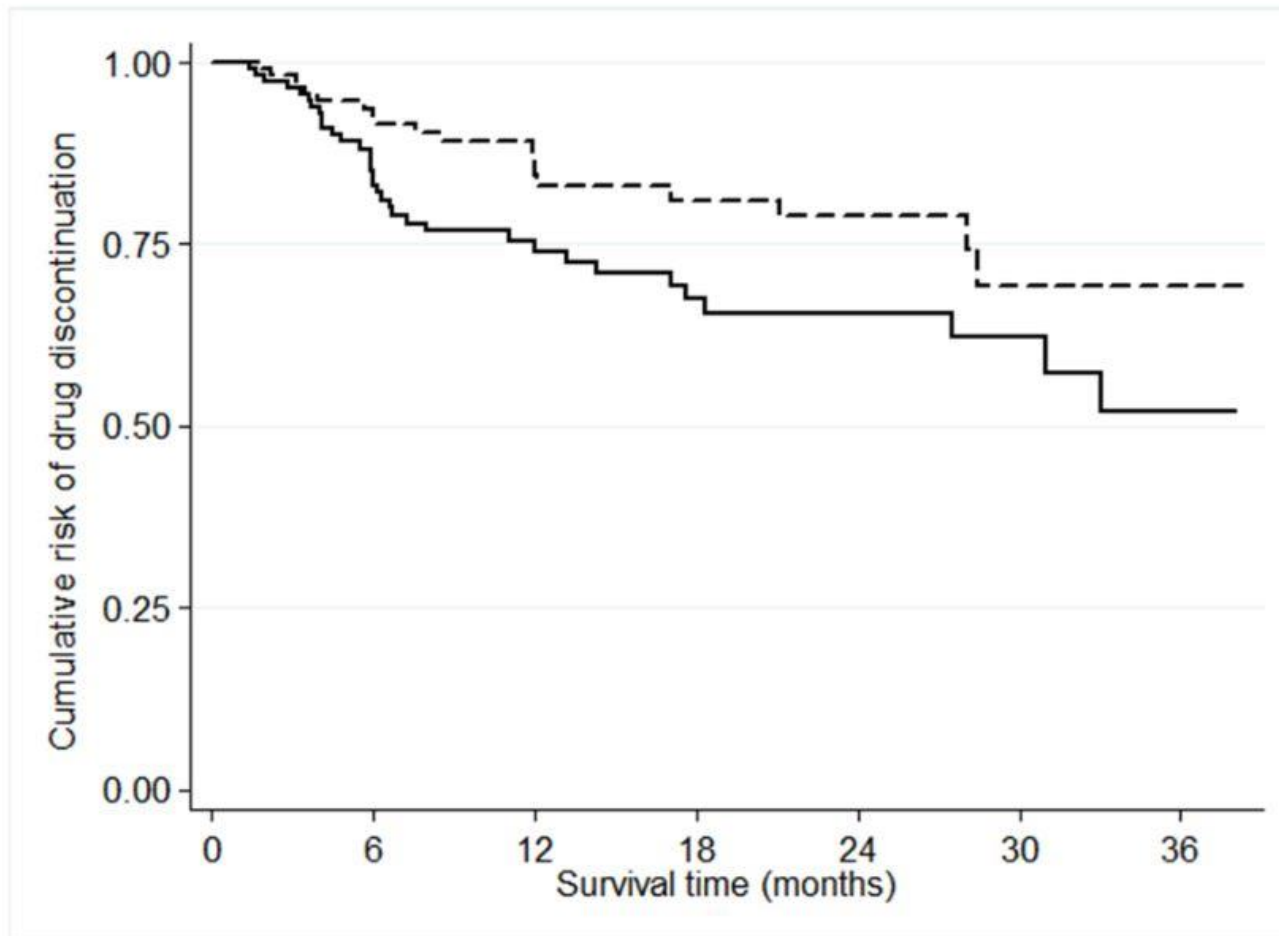

Supplement: MOESM1 [file 20349254]
